# Supplementary material
Source: bioRxiv or medRxiv preprint supplement (https://www.medrxiv.org/highwire/filestream/77604/field_highwire_adjunct_files/2/2020.04.19.20065219-3.pdf)
Supplement: Supplementary file [file 2020.04.19.20065219-3.pdf]

# COVID-19 Symptoms & Social Distancing Web Survey

---

Start of Block: Identification and Demographic Information

Q5 We would now like to ask you a few background questions.

---

JS

Q6 What is your age?

▼ 18 (4) ... 110 (96)

---

X→

Q7 What is your gender?

- Male (1)
  - Female (2)
  - Other (96)
- 

X→

Q8 Do you currently have health insurance?

- Yes (1)
  - No (2)
  - Don't Know (88)
-

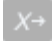

Q9 Which state or other jurisdiction in the U.S. do you currently reside in?

▼ Alabama (1) ... Other (96)

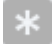

Q10 What is your ZIP code?

*Enter your 5-digit ZIP code, including a leading '0' if applicable:*

\_\_\_\_\_

Page Break \_\_\_\_\_

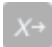

Q11 What is the highest level of schooling that you have completed or the highest degree that you have received?

- Less than high school (1)
  - High school (2)
  - Some college (3)
  - 2 year associate degree from a college or university (4)
  - 4 year college or university degree (5)
  - Some postgraduate or professional schooling, no postgraduate degree (6)
  - Postgraduate or professional degree, including master's, doctorate, medical or law degree (7)
- 

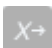

Q12 What was your total individual income in 2019?

- Less than \$20,000 (1)
  - \$20,000 to less than \$50,000 (2)
  - \$50,000 to less than \$100,000 (3)
  - \$100,000 or more (4)
  - Don't Know (88)
- 

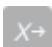

Q13 How many people are **currently** living in your household?

*INCLUDE yourself, other family members, roommates, and temporary visitors.*

▼ 1 (1) ... More than 20 (7)

---

Page Break

Display This Question:

If Q13 = 1

Q14

We are now going to ask you some questions about your health.

*The Centers for Disease Control and Prevention (CDC) has resources and advice on what to do if you are sick and if you think it may be COVID-19.*

Skip To: Q16 If Q14 Is Displayed

Q15

We are now going to ask you some questions about your health and the health of other members of your household.

*The Centers for Disease Control and Prevention (CDC) has resources and advice on what to do if you or a household member is sick and if you think it may be COVID-19.*

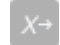

Q16 Have you experienced any of the following symptoms in the past two weeks?

|                             | RESPONSE              |                       |                       |
|-----------------------------|-----------------------|-----------------------|-----------------------|
|                             | Yes (1)               | No (2)                | Don't Know (88)       |
| Fever (1)                   | <input type="radio"/> | <input type="radio"/> | <input type="radio"/> |
| Dry Cough (2)               | <input type="radio"/> | <input type="radio"/> | <input type="radio"/> |
| Tiredness (3)               | <input type="radio"/> | <input type="radio"/> | <input type="radio"/> |
| Shortness of Breath (4)     | <input type="radio"/> | <input type="radio"/> | <input type="radio"/> |
| Other Flu-Like Symptoms (5) | <input type="radio"/> | <input type="radio"/> | <input type="radio"/> |

Display This Question:

If Q13 != 1

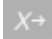

Q17

Has anyone else in your household besides yourself experienced any of these five symptoms in the past two weeks?

|                             | RESPONSE              |                       |                       |
|-----------------------------|-----------------------|-----------------------|-----------------------|
|                             | Yes (1)               | No (2)                | Don't Know (88)       |
| Fever (1)                   | <input type="radio"/> | <input type="radio"/> | <input type="radio"/> |
| Dry Cough (2)               | <input type="radio"/> | <input type="radio"/> | <input type="radio"/> |
| Tiredness (3)               | <input type="radio"/> | <input type="radio"/> | <input type="radio"/> |
| Shortness of Breath (4)     | <input type="radio"/> | <input type="radio"/> | <input type="radio"/> |
| Other Flu-Like Symptoms (5) | <input type="radio"/> | <input type="radio"/> | <input type="radio"/> |

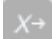

Q18 Have you ever been tested for coronavirus (COVID-19)?

- Yes (1)
- No (2)
- Don't Know (88)

Display This Question:

If Q18 = Yes

Q19 In which month did you have your most recent coronavirus (COVID-19) test?

▼ January (1) ... December (12)

---

*Display This Question:*

*If Q18 = Yes*

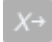

Q20 Have you received the result of this coronavirus (COVID-19) test?

Yes (1)

No (2)

---

*Display This Question:*

*If Q20 = Yes*

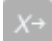

Q21 What was the result of this coronavirus (COVID-19) test?

Positive (1)

Negative (2)

Don't Know / Inconclusive / Prefer not to answer (88)

---

Page Break



Q22 Did you receive a flu vaccine any time between September 2019 and today?

- Yes (1)
  - No (2)
  - Don't Know (88)
- 

*Display This Question:*

*If Q13 != 1*

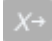

Q23 Did anyone else in your household receive a flu vaccine any time between September 2019 and today?

- Yes (1)
  - No (2)
  - Don't Know (88)
- 

Page Break

---





Q24 We now want you to answer some questions about any paid work you might have.

Were you working for pay in February 2020?

- Yes (1)
- No (2)

---

*Display This Question:*

*If Q24 = Yes*

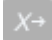

Q25 Since March 1, 2020, have you seen a decrease in paid income from work?

- No decrease (1)
- Some decrease (2)
- I no longer have any income from work. (3)

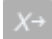

Q26 During the past seven days, have you done any paid work?

- Yes (1)
- No (2)

---

*Display This Question:*

*If Q26 = Yes*

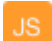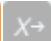

Q27 During the past seven days, how many days did you leave your home for paid work?

▼ 0 (0) ... 7 (7)

*Display This Question:*

*If Q27 != 0*

*And Q26 = Yes*

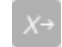

Q28 During your most recent day at work, approximately how many people did you come into close contact with (within six feet)?

*INCLUDE co-workers, customers, students, delivery workers, commuters you travel with, etc.*

- None (0)
- Less than 10 (1)
- Between 11 and 50 (2)
- Between 51 and 100 (3)
- More than 100 (4)
- Don't Know (88)

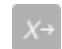

Q29 Prior to the current coronavirus (COVID-19) outbreak, did you regularly work outside the home?

- Yes (1)
- No (2)

Display This Question:

If Q29 = Yes



Q30 Prior to the current coronavirus (COVID-19) outbreak, approximately how many people did you come into close contact with during a usual work day (within six feet)?

*INCLUDE co-workers, customers, students, delivery workers, commuters you travel with, etc.*

- None (0)
- Less than 10 (1)
- Between 11 and 50 (2)
- Between 51 and 100 (3)
- More than 100 (4)
- Don't Know (88)

---

Page Break

Q31 We would now like to ask you some questions about social distancing.

---

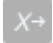

Q32 During the past seven days, how many days did you leave your home?

▼ 0 (0) ... 7 (7)

---

*Display This Question:*

*If Q32 != 0*

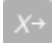

Q33 Did you leave your home yesterday?

Yes (1)

No (2)

---

*Display This Question:*

*If Q33 = Yes*

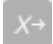

Q34 How many hours were you outside your home yesterday?

▼ Less than 1 hour (0) ... More than 15 hours (7)

---

*Display This Question:*

*If Q33 = Yes*

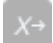

Q35 What were your reasons for going out yesterday?

SELECT ALL THAT APPLY.

- Work (1)
- Groceries / shopping (2)
- Bank / ATM (3)
- Exercise / walk / recreation (4)
- Health care / visit to doctor or pharmacy (5)
- Meeting friends or relatives (6)
- Taking out the trash / getting mail (7)
- Getting tired / bored of being inside of the house (8)
- Education (10)
- Religious services / Church (11)
- Volunteering (12)
- Other (96)

End of Block: Identification and Demographic Information

---

Start of Block: Block 2

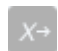

Q36 Excluding members of your household, how many people ***in total*** did you come into close contact with (within six feet) yesterday?

*INCLUDE any co-workers, relatives, neighbors, delivery workers, other shoppers, etc. that you might have met.*

▼ 0 (0) ... Don't Know (88)

End of Block: Block 2

---

### **Anxiety and Stress?**

The CDC has resources for managing anxiety and stress, including information about reducing stress in yourself and others.

The **Disaster Distress Helpline, 1-800-985-5990**, is a 24/7, 365-day-a-year, national hotline dedicated to providing immediate crisis counseling for people who are experiencing emotional distress related to any natural or human-caused disaster, including disease outbreaks like COVID-19. This toll-free, multilingual, and confidential crisis support service is available to all residents in the United States and its territories.
